# Supplementary material for: Comparative TMT Proteomic Analysis Unveils Unique Insights into Helicoverpa armigera (Hübner) Resistance in Cajanus scarabaeoides (L.) Thouars
Source: MDPI journal article supplement (doi:10.3390/ijms22115941), 2021-05-31
Supplement: s1 [file s1]

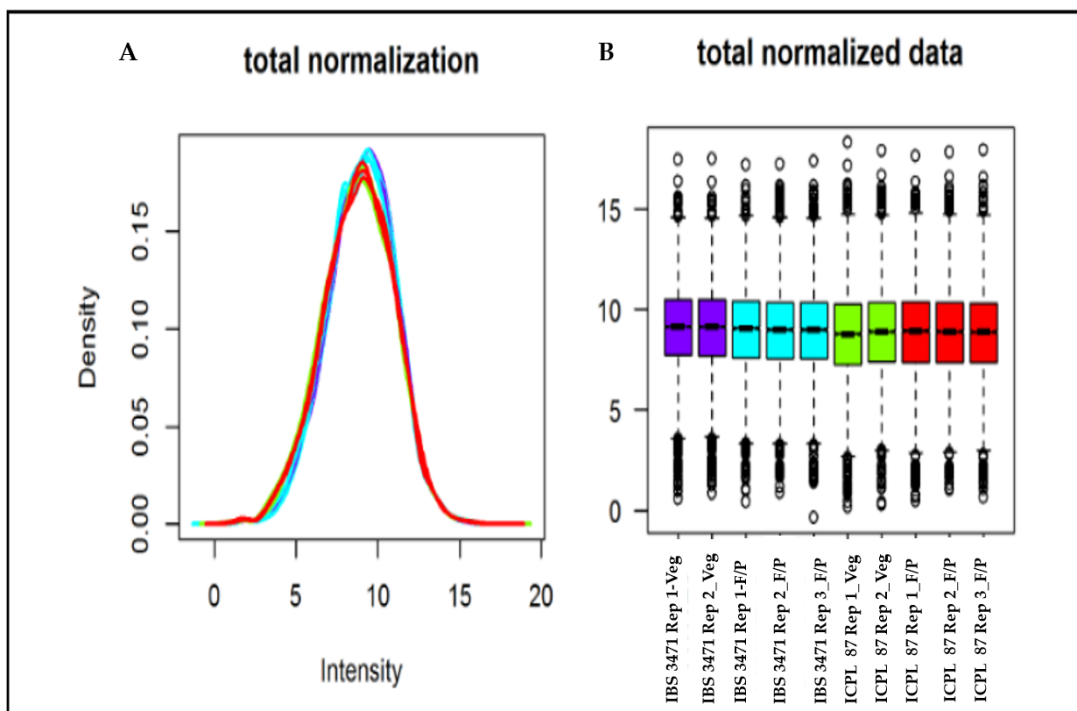

**Supplementary Figure S1.** Post-normalised data showing variability in the TMT-MS data. (A) Density plot and (B) Box plots of all identified proteins. ICPL 87 at flowering/podding stage [replication 3] was used as reference ratio across all samples.

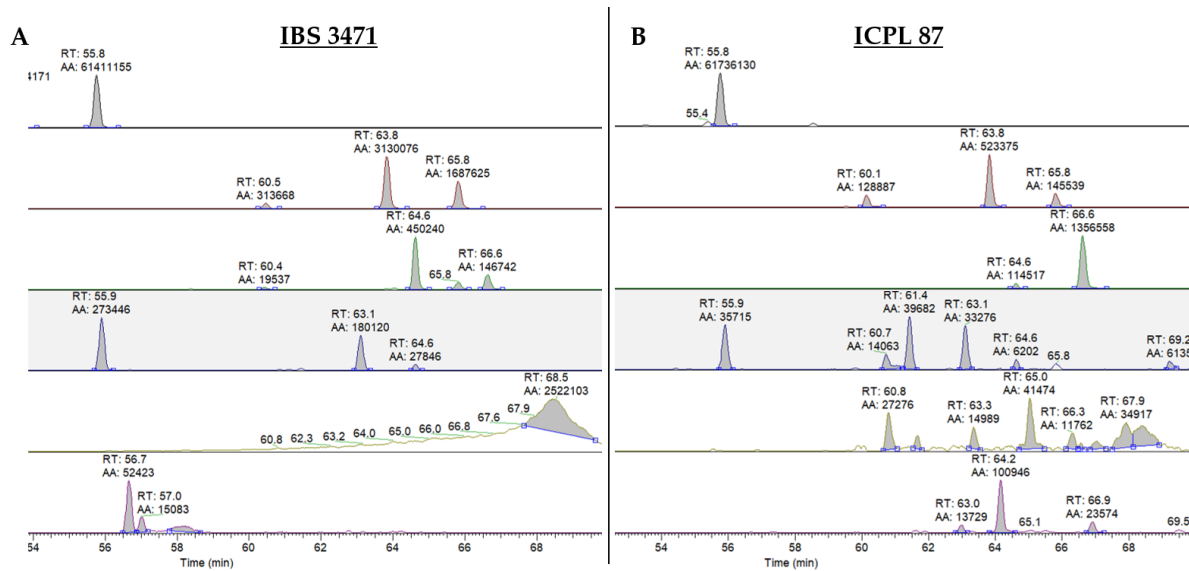

**Supplementary Figure S2.** LCMS zoomed chromatogram of identified flavonoids compounds. (A) IBS 3471 chromatograms and (B) ICPL 87 chromatogram.

**Supplementary Table S2.** List of primers used for qRT-PCR in the study

| Pathway                                        | Gene ID                                 | Prime<br>r type | Primer sequence 5' - 3' | Amplicon<br>size (bp) | Source               |
|------------------------------------------------|-----------------------------------------|-----------------|-------------------------|-----------------------|----------------------|
| General<br>Phenylpropanoid<br>pathway          | Phenylalanine ammonia-<br>lyase (PAL)   | F-              | CTTGCCCTTGTGAATGGCAC    | 92                    | This<br>study        |
|                                                |                                         | R-              | AKAACTTCAGACAAGACAGC    |                       |                      |
|                                                | Cinnamate 4-hydroxylase<br>(C4H)        | F-              | CTCCTCCTGGCCTCAACAAG    | 100                   |                      |
|                                                |                                         | R-              | AACGACCTTGGCTTTGCAAC    |                       |                      |
|                                                | 4- Coumaroyl-CoA ligase<br>(4CL)        | F-              | TGGTGGCTCTGACGAAAGAC    | 97                    |                      |
|                                                |                                         | R-              | AAGACTTCCTTTCCAGCGG     |                       |                      |
| Flavonol<br>biosynthesis                       | Chalcone synthase (CHS)                 | F-              | GAYGAGATGAGAAGGTGGTC    | 95                    |                      |
|                                                |                                         | R-              | GTAAKCCAGGGCCAAACCC     |                       |                      |
|                                                | Flavonol synthase (FLS)                 | F-              | TCAACTACGACATGTGGCCC    | 123                   |                      |
|                                                |                                         | R-              | CCAACCCTAACCCTTCGGAC    |                       |                      |
| Monolignols<br>biosynthesis                    | Cinnamyl alcohol<br>dehydrogenase (CAD) | F-              | GCTCCTCTACTATGCGCAGG    | 117                   |                      |
|                                                |                                         | R-              | AGCTATGTGTCCAAGCCAC     |                       |                      |
| House Keeping<br>Genes<br>(Reference<br>genes) | Initiation factor 4α                    | F-              | GCCGAGATCACACAGTCTCA    | 95                    | Sinha et<br>al. 2015 |
|                                                |                                         | R-              | ACCACGAGCCAAAAGATCAG    |                       |                      |
|                                                | Actin 11                                | F-              | GGCATACATTGCCCTTGACT    | 97                    |                      |
|                                                |                                         | R-              | GAACCTCGGGACATCTGAAA    |                       |                      |
